# Supplementary material for: Enhanced perovskite crystallization by the polyvinylpyrrolidone additive for high efficiency solar cells
Source: Royal Society of Chemistry journal article supplement (doi:10.1039/c9se00632j), 2019-01-01

# Supporting Information

## Enhanced Perovskite Crystallization by Polyvinylpyrrolidone Additive for High Efficiency Solar Cells

Jin Yan<sup>a,b</sup>, Nan Li<sup>a,b</sup>, Yuqian Ai<sup>a</sup>, Zenggui Wang<sup>a</sup>, Weichuang Yang<sup>a,b</sup>, Min Zhao<sup>a</sup>, Chunhui Shou<sup>c</sup>, Baojie Yan<sup>a</sup>, Jiang Sheng<sup>a\*</sup>, and Jichun Ye<sup>a,b\*</sup>

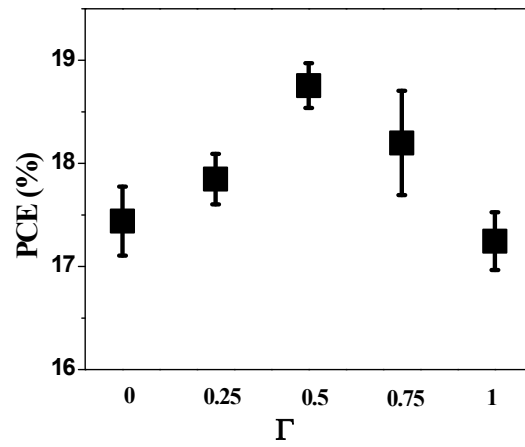

**Figure S1.** The box chart of *PCEs* of the PSCs with the different PVP concentrations ( $\Gamma$ -0,  $\Gamma$ -0.25,  $\Gamma$ -0.5,  $\Gamma$ -0.75 and  $\Gamma$ -1), where the number of total samples accounted for statistics is 50.

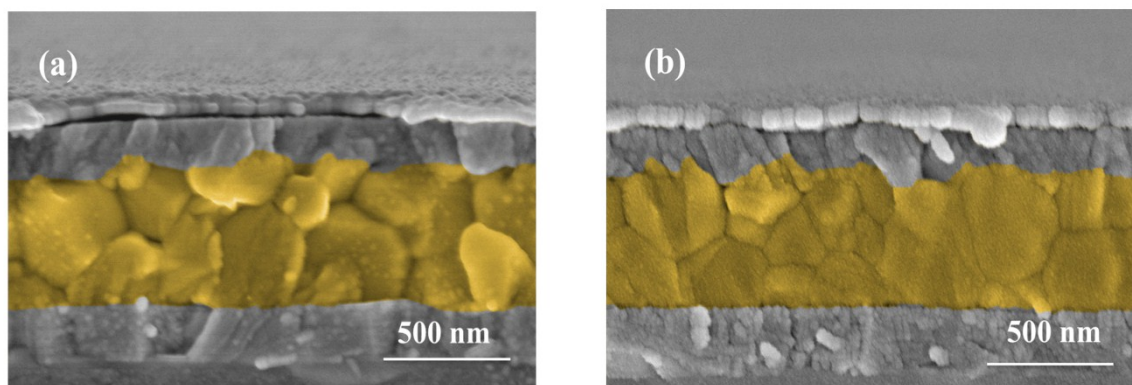

**Figure S2.** The samples of  $\Gamma$ -0 and  $\Gamma$ -0.5 have the similar perovskite film thickness for (a) and (b) respectively.

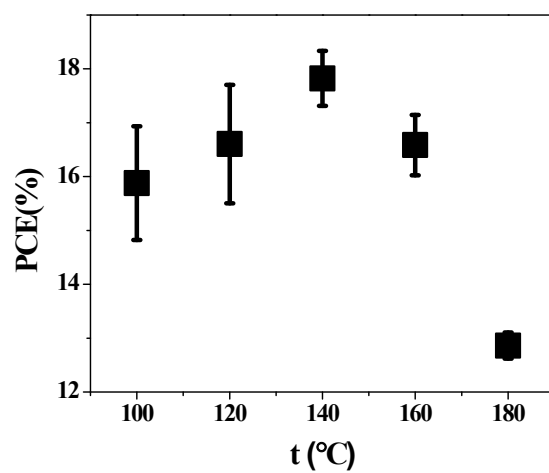

**Figure S3.** The data of PCEs of the PSCs based on  $\Gamma$ -0.5 under different annealing temperature.

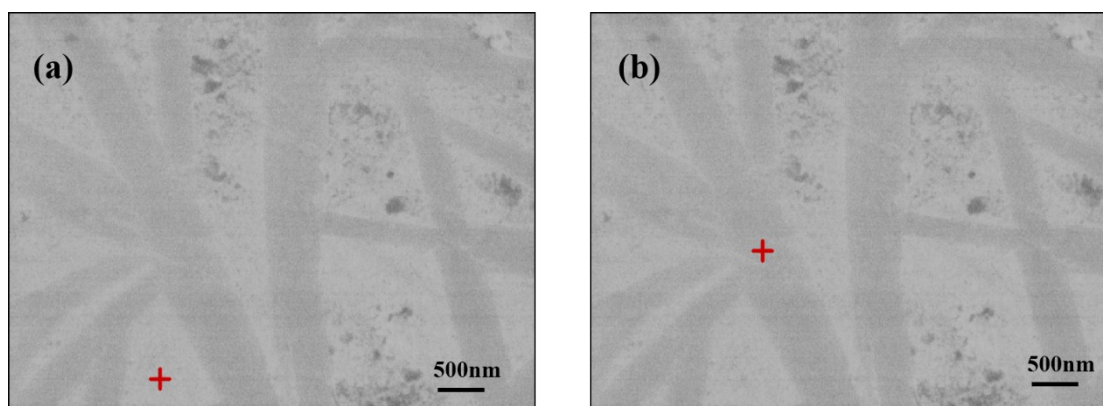

| <i>Element</i> | <i>Wt%</i> | <i>At%</i> |
|----------------|------------|------------|
| <i>NK</i>      | 03.33      | 25.68      |
| <i>BrL</i>     | 09.64      | 13.01      |
| <i>PbM</i>     | 38.40      | 19.99      |
| <i>IL</i>      | 48.63      | 41.33      |
| <i>Matrix</i>  | Correction | ZAF        |

| <i>Element</i> | <i>Wt%</i> | <i>At%</i> |
|----------------|------------|------------|
| <i>NK</i>      | 06.32      | 39.55      |
| <i>BrL</i>     | 11.75      | 12.88      |
| <i>PbM</i>     | 33.62      | 14.22      |
| <i>IL</i>      | 48.31      | 33.35      |
| <i>Matrix</i>  | Correction | ZAF        |

**Figure S4.** Elemental analysis of different points of the sample ( $\Gamma$ -0) characterized by Energy Dispersive Spectrometer (EDS).

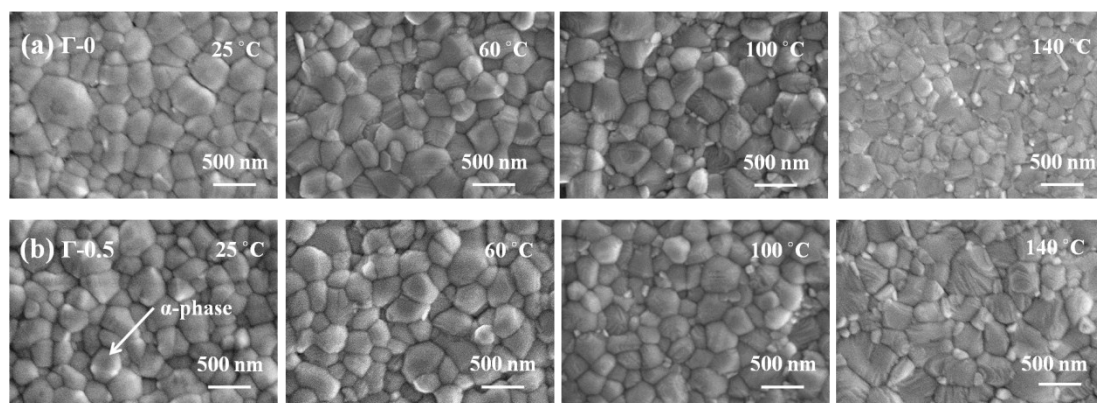

**Figure S5.** The SEM images of the perovskite films of (a)  $\Gamma-0$  and (b)  $\Gamma-0.5$  under the different annealing temperature of 25 °C, 60 °C, 100 °C, 140 °C, respectively.

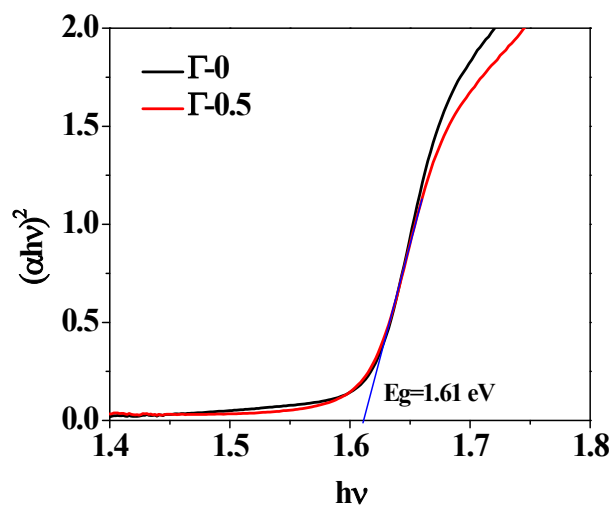

**Figure S6.** The samples of  $\Gamma-0$  and  $\Gamma-0.5$  have the same band gap (1.61 eV).

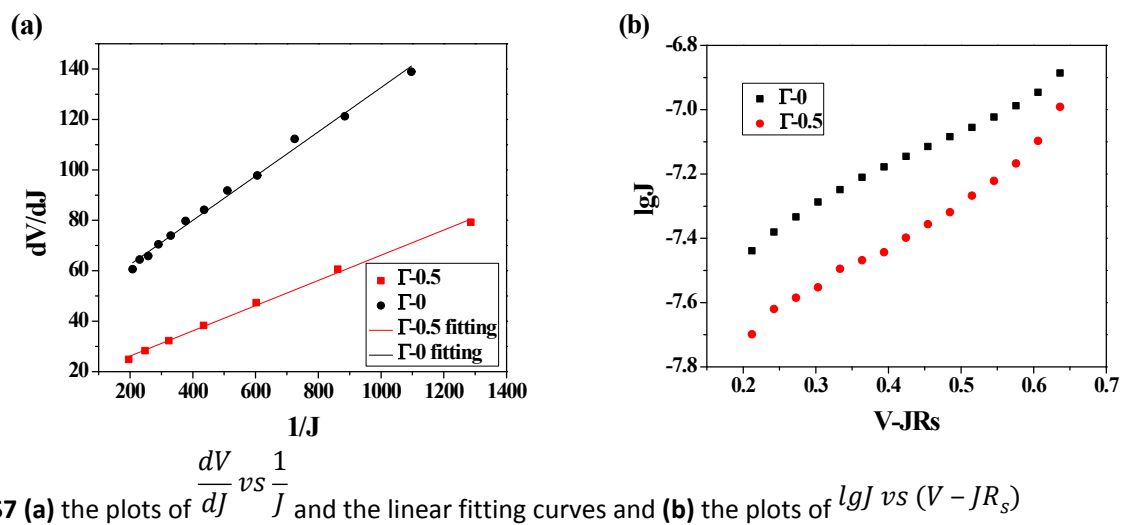

Supplement: c9se00632j1.pdf [file c9se00632j1.pdf]
